1 **SIMON, an automated machine learning system reveals immune signatures of**  
2 **influenza vaccine responses**

3 **Authors:** Adriana Tomic<sup>1,2\*</sup>, Ivan Tomic<sup>3</sup>, Yael Rosenberg-Hasson<sup>4</sup>, Cornelia L. Dekker<sup>5</sup>,  
4 Holden T. Maecker<sup>4</sup> and Mark M. Davis<sup>1,6,7\*</sup>

5 **Affiliations:**

6 <sup>1</sup>Institute of Immunity, Transplantation and Infection, Stanford University School of Medicine,  
7 Stanford, CA 94304, USA.

8 <sup>2</sup>Oxford Vaccine Group, Department of Pediatrics, University of Oxford, Oxford OX3 9DU, UK.

9 <sup>3</sup>Independent Researcher, Electronic address: info@ivantomic.com.

10 <sup>4</sup>Human Immune Monitoring Center, Stanford University, Stanford, CA 94304, USA.

11 <sup>5</sup>Department of Pediatrics, Stanford University School of Medicine, Stanford, CA 94304, USA.

12 <sup>6</sup>Department of Microbiology and Immunology, Stanford University School of Medicine,  
13 Stanford, CA 94304, USA.

14 <sup>7</sup>Howard Hughes Medical Institute, Stanford University, Stanford, CA 94304, USA.

15 \*To whom correspondence should be addressed: mmdavis@stanford.edu (M.M.D) and  
16 atomic@stanford.edu (A.T)

17 **Running Title:** Automated machine learning

18

19 **Abstract (175):** Machine learning holds considerable promise for understanding complex  
20 biological processes such as vaccine responses. Capturing interindividual variability is essential to  
21 increase the statistical power necessary for building more accurate predictive models. However,  
22 available approaches have difficulty coping with incomplete datasets which is often the case when  
23 combining studies. Additionally, there are hundreds of algorithms available and no simple way to  
24 find the optimal one. Here, we developed Sequential Iterative Modelling “OverNight” or SIMON,  
25 an automated machine learning system that compares results from 128 different algorithms and is  
26 particularly suitable for datasets containing many missing values. We applied SIMON to data from  
27 five clinical studies of seasonal influenza vaccination. The results reveal previously unrecognized  
28 CD4<sup>+</sup> and CD8<sup>+</sup> T cell subsets strongly associated with a robust antibody response to influenza  
29 antigens. These results demonstrate that SIMON can greatly speed up the choice of analysis  
30 modalities. Hence, it is a highly useful approach for data-driven hypothesis generation from  
31 disparate clinical datasets. Our strategy could be used to gain biological insight from ever-  
32 expanding heterogeneous datasets that are publicly available.

33 **[Main Text: 7,756]**

## 34 **Introduction**

35 The immune system is comprised of multiple cell types that work together to develop an  
36 effective response to a given pathogen. However, which of these myriad cell types are important  
37 in a particular response is not well understood. The increasingly common systems immunology  
38 approach measures gene expression and different cells and molecules in the immune system during  
39 an infection or vaccination and uses computational methods to discern which components are most  
40 important (1-6). These studies have the practical goal of determining what makes one vaccine  
41 formulation better than another or how individuals vary. In addition, it may suggest a mechanistic

42 understanding of how an effective immune response is achieved. To accomplish this, an accurate  
43 modeling of the complex processes that lead to a successful outcome is crucial.

44 Over the past few years, many systems studies of influenza vaccination responses in human  
45 beings have been analyzed computationally, but the results have not been consistent (2, 3, 7-10).  
46 One reason for these inconsistent results are the relatively small sample sizes. Another is that  
47 studies focus on only one biological aspect, for example molecular correlates of protection by  
48 using transcriptome data (11). However, a more robust approach to understanding how a vaccine  
49 works would involve analyzing multiple parameters from many individuals across different  
50 populations to more accurately capture biological variability. Furthermore, this would increase the  
51 statistical power, ultimately leading to the generation of classification and regression models with  
52 more robust performance metrics. While the number of studies and the amount of data are  
53 expanding dramatically, analyzing diverse samples across clinical studies remains challenging  
54 (12). This is particularly true for data from flow and mass cytometry where the number of markers  
55 analyzed can vary tremendously (13).

56 In this study, we develop an approach that optimizes a machine learning workflow through  
57 a Sequential Iterative Modeling “OverNight” (SIMON). SIMON is specifically tailored for clinical  
58 data containing inconsistent features with many missing values. SIMON utilizes multi-set  
59 intersections to successfully feed such data into an automated machine learning process with  
60 minimal sample losses. Our approach runs hundreds of different machine learning algorithms to  
61 find the ones which fit any given data distribution, and this maximizes predictive accuracy and  
62 other performance measurements. We used SIMON to analyze data from the Stanford Human  
63 Immune Monitoring Center (HIMC) collected from five separate clinical studies of seasonal  
64 influenza vaccination, obtained over eight years, with various platforms and expanding

65 parameters. This enabled a systems-level identification of features that correlate with protective  
66 immunity to influenza. In the resulting models, we identified several previously unknown immune  
67 cell subsets that correlated with a successful influenza vaccination outcome, as defined by antibody  
68 responses. The impact of our findings is twofold. First, the study offers a new tool that can increase  
69 the accuracy of predictions from heterogeneous biological datasets. Second, it provides new targets  
70 for the development of the next-generation of influenza vaccines.

## 71 **Results**

### 72 *Subhead 1. Preprocessing of data collected across different clinical studies*

73 To test robustness of our approach, we used data from the Stanford HIMC. This data included  
74 187 nominally healthy individuals between 8 and 40 years of age undergoing an annual influenza  
75 vaccination recruited over eight consecutive seasons, from 2007 to 2014, and five clinical studies  
76 (**Fig. 1A**). Blood samples were acquired before vaccination and on day 28 after vaccination. Over  
77 3,800 parameters were measured at baseline. This included 102 blood-derived immune cell subsets  
78 analyzed by mass cytometry (**Fig. S1, Table S1**). It also included the signaling capacity of over  
79 30 immune cells subsets stimulated with seven conditions, which were evaluated by measuring the  
80 phosphorylation of nine proteins (**Table S2**). Additionally, up to 50 serum analytes were evaluated  
81 using Luminex bead arrays (**Table S3**). On day 28 after vaccination, the serum titer of  
82 haemagglutinin-specific antibodies against all vaccine strains was determined using the  
83 hemagglutination inhibition assay (HAI), which is the best-defined correlate of influenza  
84 immunity induced by this vaccine (14). The HAI antibody titers were calculated as the fold change  
85 between the HAI titer at day 28 relative to the baseline titer. High and low responders were  
86 determined using metrics defined by the US Centers for Disease Control to evaluate influenza  
87 vaccine efficacy: seroconversion and seroprotection (15). Individuals were considered to be high

88 responders if they had a protective HAI antibody titer to all vaccine strains (HAI antibody titer >  
89 40) and if they seroconverted (geomean HAI titer > 4).

90 Out of 187 analyzed donors, 64 were identified as high responders and 123 as low responders (**Fig.**  
91 **1B**). Overall, there were no major differences in the age, gender, or study year between the high  
92 and low responders (**Fig. S2**). The only exception was that a higher proportion of adolescents were  
93 high responders, which is in line with published data(16) (**Fig. S2B**).

#### 94 *Subhead 2. Dealing with missing values using intersection function*

95 A major problem when using data across clinical studies and years is the lack of overlap  
96 between the features measured. Indeed, even though the data comes from a single facility, in many  
97 years there was an increase in the number of parameters measured, especially in the transition from  
98 FACS analysis (12-14 parameters) to mass cytometry (25-34 parameters). Since all assays were  
99 not performed across all studies and years (**Fig. S3**), our initial dataset had many missing values.  
100 The dataset contained 187 rows/donors and 3,284 columns/features, yielding a total of 614,108 values.  
101 However, 572,081 values were missing, resulting in high data sparsity. That is, the percentage of  
102 missing values in the dataset was 93.2% (**Fig. S4**). Such high data sparsity, which is commonly  
103 encountered in the clinical data, does not allow for straightforward statistical analysis. Therefore, we  
104 had to reduce the number of missing values. Researchers and data scientists deal with missing values  
105 either by deletion or by imputation of missing data (17). However, analysis of the missing data  
106 distribution revealed that when all studies were combined, the dataset had missing values in every  
107 column and every row and many of the columns and rows had sparsity of 90% (**Table S4**).  
108 Therefore, if we deleted either rows or columns, this would result in data with zero subjects. This  
109 approach was unsuitable. Additionally, effective imputation was strongly limited by the small  
110 number of cases that could be used as prior knowledge. Overall, we concluded that the high number

111 of columns and rows with missing values made it impossible to use the whole dataset for further  
112 analysis.

113 Since this could be a very useful dataset for predictive modeling of influenza vaccine  
114 responses, we explored alternative ways to reduce the number of missing values. To ensure that  
115 interpretation of the initial dataset was preserved and so as not to introduce bias, we selected  
116 feature subsets from the original dataset without transformation by identification of the overlap  
117 (i.e. intersection) between multiple donors. We hypothesized that by using intersection, we could  
118 identify features shared across donors. Such a process could generate feature subsets that span an  
119 entire initial dataset. Additionally, it was expected that reducing the number of features would  
120 improve the performance of the model, such as was shown for random initial subset selection (18).

121 In the first step of SIMON, we implemented an algorithm, *mulset*, to identify features shared  
122 across donors and generate datasets containing all possible combinations of features and donors  
123 across the entire initial dataset (**Fig. 2**). While strategies to find an intersection among large number  
124 of sets have been reported(19), detecting intersections in a dataset with 614,108 datapoints would  
125 be challenging. The *mulset* was inspired by an approach commonly used in computer science to  
126 accelerate detection of duplicated records across large databases (20). By using the intersect  
127 function, we identified shared features between donors. These were converted to a unique shared  
128 feature identifier using the hash function. This process allowed the rapid identification of donors  
129 with shared features and the generation of datasets that can be used in further analysis. The *mulset*  
130 algorithm calculated overlapping features between all donors, resulting in 34 datasets with  
131 different numbers of donors and features (**Table S5**). After applying the *mulset* algorithm, the  
132 dimensionality of the data was significantly reduced, since all generated datasets had a maximum  
133 of 300 shared features. Eleven of the generated datasets had a higher number of donors than

134 features, with a maximum number of 143 donors that shared 49 features (**Table S5, dataset 8**).  
135 Overall, the first step in the SIMON produced more restricted datasets with higher data quality and  
136 reduced the number of features, making possible to continue the data analysis.

### 137 *Subhead 3. Automating the machine learning process and feature selection*

138 The next step, following data preprocessing, was to apply machine learning algorithms to  
139 extract patterns and knowledge from each of the 34 datasets. To select relevant features, we based  
140 our approach on the method for feature selection proposed by Kohavi and John (21). In the original  
141 approach, termed wrapper, feature subsets were selected using two families of algorithms: the  
142 decision trees and the Naïve-Bayes (21). In this study, we build upon this approach by adding  
143 ensemble algorithms (of which Random Forest was previously shown to be suitable for feature  
144 selection (22)) and other dimensionality-reduction algorithms, such as discriminant analysis. It is  
145 widely recognized that a best algorithm for all datasets does not exist (23). Currently, choosing an  
146 appropriate algorithm is done through a trial-and-error approach, with only a few algorithms tested.  
147 To identify optimal algorithms more quickly and efficiently across a broad spectrum of  
148 possibilities, we implemented an automated machine learning process in SIMON.

149 SIMON is described briefly in **Fig. 3**. The feature subset selection was performed by testing  
150 multiple algorithms without any prior knowledge and user-defined parameters on each of the 34  
151 datasets in a sequential and iterative manner. First, each dataset was split into 75% training and  
152 25% test sets, preserving balanced distribution of high and low responders. The training set was  
153 used for model training and feature selection. The accuracy of the feature selection was determined  
154 using a 10-fold cross-validation, which was shown to out-perform other resampling techniques for  
155 model selection (24). The test set was used for evaluating model performance on independent data  
156 not used in the model training. In general, it is most efficient to train the model on the entire dataset.

157 However, in our case, it was important to have an independent test set to evaluate and then compare  
158 performance of the many models we expected to obtain. Additionally, evaluating model  
159 performance using only cross-validation is not sufficient to conclude that model can be applied to  
160 other datasets. There could be a problem with overfitting, such as when a model does not generalize  
161 well to unseen data. Second, a fully automated process of model training utilizing 128 machine  
162 learning algorithms was done initially on the training set and repeated for each dataset. **Table S6**  
163 provides a list of all machine learning classification algorithms used. Each model was evaluated  
164 by calculating the performance parameters using the confusion matrix on the training and test sets.  
165 A confusion matrix calculates false positive and negatives, as well as true positive and negatives.  
166 This allows for more detailed analysis than accuracy, which only gives information about the  
167 proportion of correct classifications, and therefore can lead to misleading results (25). In SIMON,  
168 for each model we calculated the proportion of actual positive cases that were correctly identified  
169 (i.e. sensitivity) and the proportion of correctly identified actual negative cases (i.e. specificity).  
170 All performance parameters were saved in the MySQL database. Finally, to compare the models  
171 and discover which performed best, we calculated an Area Under the ROC Curve (AUROC). This  
172 is a widely-used measure of quality for the classification of models, especially in biology (26). A  
173 random classifier that cannot distinguish between two groups has AUROC of 0.5, while AUROC  
174 for a perfect classifier that separates two groups without any overlap is equal to 1.0 (27). Therefore,  
175 the training and test AUROC are reported throughout the text and models are compared using that  
176 metric of performance.

177 To test the feasibility of SIMON, we ran more than 2,400 machine learning analyses on 34  
178 datasets. SIMON built models for 19 datasets, with an average of 54 models built per dataset  
179 (**Table S7**). None of the 128 machine learning algorithms tested were able to build a model for 15



180 of the datasets. This indicates that those have poor data quality and distributions. Therefore, they  
181 were discarded from further analysis. With the remaining 19 datasets, models were built with the  
182 training AUROC values ranging from a minimum of 0.08 to a maximum of 0.92 (**Table S7**).  
183 Overall, the automated machine learning process improved the performance of the models in all  
184 19 datasets, with a gain of performance ranging from 30 to 91% (**Table S7**). This indicates that  
185 SIMON facilitates the identification of optimal algorithms, which ultimately increases the  
186 performance of models.

#### 187 *Subhead 4. Performance estimation and model selection*

188 Before model comparison, other performance parameters were calculated, in addition to  
189 AUROC, and were used to filter out poorly performing models with the goal of facilitating further  
190 exploratory analysis. To remove random classifiers, all models with  $AUROC \leq 0.5$  on both training  
191 and test sets were discarded. Furthermore, all models in which specificity and sensitivity of both  
192 training and test sets were  $< 0.5$  (i.e. models with higher proportion of false positive and negative  
193 values) were also removed. This restriction discarded models in which the classifier achieved high  
194 performance, as indicated by a high AUROC, at the cost of a high false positive or negative rate  
195 (28, 29). After applying these filters, many models were removed, decreasing the average number  
196 of models per dataset to three (**Table S8**). Additionally, eight datasets were discarded. This  
197 filtering step was essential to remove models which would otherwise be falsely evaluated as high  
198 performing, such as those built using dataset 205, for which a high AUROC of 0.92 was obtained  
199 at the expense of low specificity (0.06) (**Table S7**).

200 To compare models within one dataset and discover which performs best, the random  
201 number seed was set before training with each algorithm. This ensured that each algorithm trained  
202 the model on the same data partitions and repeats. Further, it allowed for comparison of models

203 using AUROC. In general, AUROC values between 0.9-1 are considered excellent, 0.8-0.9 good,  
204 0.7-0.8 fair and values between 0.6-0.7 are considered as having poor discriminative ability (30).  
205 In SIMON, models trained on six datasets were built with fair discriminative ability (max. train  
206 AUROC between 0.7-0.8) (**Table S8**). To avoid overfitting, we additionally evaluated the  
207 performance of each model on the test set, which was not used for building the model. In this case,  
208 models trained on the three datasets were built with a fair discriminative ability (**Table S9**,  
209 **datasets 5, 13, and 171**). One dataset (**Table S9, dataset 36**) was built with a good discriminative  
210 ability (max. test AUROC 0.86), which could be generalized to an independent set. It should be  
211 noted that maximum AUROC values did not necessarily come from the same model (e.g.  
212 maximum train AUROC might come from model 1, while maximum test AUROC from model 2).  
213 To account for that, we add another filter to remove all models with poor discriminative ability,  
214 that is all models in which the train and test AUROC were less than 0.7. By applying this  
215 restriction, we were left with only two datasets (datasets 13 and 36). These were used for further  
216 analysis and feature selection. The model build on dataset 36, with the shrinkage discriminant  
217 analysis, out-performed the other four models as evaluated by comparison of train AUROC (**Fig.**  
218 **S5A, Table S10**). A model was built with train AUROC of 0.78 and it performed well on an  
219 independent test set (test AUROC 0.86). The model build on dataset 13 with the Naïve- Bayes  
220 performed better than the other model built for the same dataset (train AUROC 0.75, test AUROC  
221 0.7) (**Fig. S5B, Table S11**).

222 Overall, SIMON facilitated exploratory analysis and discovery of models with good discriminative  
223 performance by integrating the filtering steps and evaluating comprehensive model performance.

224 *Subhead 5. Identification of all-relevant cellular predictors using SIMON*

225 After selection of the best-performing models, we focused on feature selection. Our goal was  
226 to use SIMON to identify all-relevant features to deepen our knowledge about the process that  
227 drives antibody generation in response to influenza vaccination. To solve this problem, classifiers  
228 were used in SIMON to rank features based on their contribution to the model. Features were  
229 ranked depending on the variable importance score calculated for each model (31). The score  
230 ranges from 0 to 100. Features with variable importance score of 0 are not important for the  
231 classification model and can be removed from training the model.

232 First, we focused on the model built on dataset 13 with 61 donors (**Table S12**). Out of 76  
233 features, 64 had measurable variable importance score and 15 features had variable importance  
234 score above 50 (**Fig. 4A, Table S13**). The top-ranked feature that highly contributed to this model  
235 was CD4<sup>+</sup> T cells with the CD127<sup>-</sup>CD25<sup>hi</sup> phenotype (described as regulatory T cells or Tregs(32))  
236 that expressed CD161 and CD45RA markers (**Table S13, rank 1**). The frequency of Tregs with  
237 CD161<sup>-</sup>CD45RA<sup>+</sup> phenotype was shown to be significantly greater among the high responders  
238 (**Fig. 4B**, FDR < 0.01). To further explain features that contributed to this model, we performed  
239 correlation analysis. Correlation analysis revealed that Tregs with CD161<sup>-</sup>CD45RA<sup>+</sup> phenotype  
240 had a significant positive correlation with the top-ranked feature, CD161<sup>+</sup>CD45RA<sup>+</sup> Tregs  
241 (Pearson's  $r = 0.54$ ,  $p < 0.0001$  after multiple comparison adjustment using the B-H correction)  
242 (**Fig. S6**). Additionally, CD161<sup>+</sup>CD45RA<sup>+</sup> Tregs had a weak, but significant positive correlation  
243 with CD161<sup>+</sup> CD4<sup>+</sup> T cells (Pearson's  $r = 0.08$ ,  $p = 0.001$  after multiple comparison adjustment  
244 using the B-H correction), which had high variable importance score (**Table S13, rank 9**). Such  
245 correlation indicated that these subsets might describe similar family of CD4<sup>+</sup> T cells contributing  
246 to the generation of antibody responses after influenza vaccination. Indeed, a recent study suggests

247 that expression of CD161 marks a distinct family of human T cells with a distinct lineage and with  
248 innate-like capabilities (33).

249 To experimentally validate results from this model, we analyzed the phenotype and  
250 functionality of immune cells before and after vaccination in the independent samples from 14  
251 individuals (7 high and 7 low responders) (**Table S14**). We found that after stimulation with the  
252 influenza peptides, CD161<sup>+</sup> CD4<sup>+</sup> T cells from high, but not low responders, produced TNF $\alpha$  in  
253 the samples prior to vaccination (**Fig. 4C**). This indicated that CD161<sup>+</sup> CD4<sup>+</sup> T cells from high  
254 responders had a pool of pre-existing influenza-specific T cells. Additionally, after vaccination,  
255 the frequency of CD161<sup>+</sup> CD4<sup>+</sup> T cells with a CCR6<sup>+</sup> CXCR3<sup>-</sup> (Th17) phenotype in high  
256 responders increased significantly (**Fig. 4D**).

257 The second most important feature in this model was CXCR5<sup>+</sup> CD8<sup>+</sup> T cells (also known as  
258 follicular cytotoxic T cells) (34-36) with a CCR6<sup>+</sup> CXCR3<sup>-</sup> (Tc17) phenotype (**Table S13, rank**  
259 **2**). Frequencies of CXCR5<sup>+</sup> CD8<sup>+</sup> T cells with Tc17 were significantly increased among the high  
260 responders (**Fig. 4B**, FDR < 0.01). Additionally, frequencies of CXCR5<sup>+</sup> CD8<sup>+</sup> T cells with a  
261 CCR6<sup>-</sup>CXCR3<sup>-</sup> (Tc2) phenotype were also increased in the same group (**Fig. 4B**, FDR < 0.01).  
262 CXCR5<sup>+</sup> CD8<sup>+</sup> T cells with Tc2 phenotype were also identified as important in this model (**Table**  
263 **S13, rank 7**) and had a significant positive correlation with Tc17 CXCR5<sup>+</sup> CD8<sup>+</sup> T cells (Pearson's  
264  $r = 0.66$ ,  $p < 0.0001$  after multiple comparison adjustment using the B-H correction) (**Fig. S6**).  
265 However, analysis of the experimental data showed no significant participation of CXCR5<sup>+</sup> CD8<sup>+</sup>  
266 T cells in vaccine-induced responses, even though in a few of the high responders there was an  
267 increase of CXCR5<sup>+</sup> CD8<sup>+</sup> T cells with a Tc2 and Tc17 phenotype (**Fig. 4D**).

268 The results obtained in this model were confirmed using an R package, Boruta, that  
269 implements a novel feature selection algorithm for identifying all relevant features (22). CD127<sup>-</sup>

270 CD25<sup>hi</sup> CD4<sup>+</sup> T cells with the CD161 expression and CXCR5<sup>+</sup> CD8<sup>+</sup> T cells with Tc2 or Tc17  
271 phenotype were identified as important ( $p < 0.05$ , after multiple comparison adjustment using the  
272 Bonferroni method), confirming findings obtained by SIMON (**Fig. S7A**).

273         Second, we explored the features selected in the better performing model built on dataset 36,  
274 comprising of 40 donors (**Table S15**). Out of 103 features, 88 had measurable variable importance  
275 scores ranging from 5 to 100 (**Table S16**). Of those, 17 features had a variable importance score  
276 above 50 (**Fig. 4E**), indicating a strong contribution for this classification model. Interestingly, the  
277 effector memory (EM) CD4<sup>+</sup> T cells, previously reported to correlate with antibody responses to  
278 influenza vaccine (37), were ranked in 5<sup>th</sup> place in our model. Moreover, B cells with memory  
279 phenotype, including a subset of IgD<sup>+</sup> CD27<sup>+</sup> memory B cells identified in previous studies (3, 8,  
280 38), contributed to our model (**Table S16**). Obtaining results supported by other studies gave us  
281 confidence in further analysis of our classification model. Importantly the top four features  
282 identified have not previously been implicated as playing a major role in antibody responses to  
283 influenza vaccination, or indeed any antibody response. These included CD8<sup>+</sup> T cells with  
284 expression of CD27 or CD85j markers, and CD8<sup>+</sup> T cells with varying degree of expression of  
285 CCR7 and CD45RA markers, described as naïve, effector or terminally differentiated effector  
286 (TEMRA) and memory subsets (39). Analysis of the data particularly indicated that  
287 effector/TEMRA CD8<sup>+</sup> T cells increased significantly among high responders (**Fig. 4F**, FDR <  
288 0.01). In contrast, low responders had significantly higher frequency of early CD27<sup>+</sup>/CD28<sup>+</sup> CD8<sup>+</sup>  
289 T cells and naïve CD8<sup>+</sup> T cells (**Fig. 4F**, FDR < 0.01). Moreover, the effector/TEMRA CD8<sup>+</sup> T  
290 cells were confirmed to contribute to this model by Boruta ( $p < 0.05$ , after multiple comparison  
291 adjustment using the Bonferroni method) (**Fig. S7B**).

292 The top four features that contributed the most to this model, were CD8<sup>+</sup> T cells in early or  
293 late effector or memory states, indicating they might all be contributing to the influenza response  
294 through the same underlying mechanism. Indeed, correlation analysis showed that the top ranked  
295 subset, CD27<sup>+</sup> CD8<sup>+</sup> T cells, had a significant correlation coefficient with other subsets (naïve  
296 CD8<sup>+</sup> T cells  $r = 0.80$ , CD28<sup>+</sup> CD8<sup>+</sup> T cells  $r = 0.85$ , CD85j<sup>+</sup> CD8<sup>+</sup> T cells  $r = -0.69$ ,  
297 effector/TEMRA CD8<sup>+</sup> T cells  $r = -0.61$  and EM CD8<sup>+</sup> T cells  $r = -0.71$ ,  $p < 0.0001$  after multiple  
298 comparison adjustment using the B-H correction) (**Fig. S8**). Additionally, a specific subset of  
299 CD8<sup>+</sup> T cells expressing NK-cell-related receptor CD85j was identified as the TEMRA subset  
300 (40), while the expression of CD27 or CD28 was indicative of the subsets of T cells with a naïve  
301 or early differentiation phenotype (41).

302 In the analysis of the independent samples, EM CD8<sup>+</sup> T cells from high responders produced  
303 IL17A after influenza peptide stimulation, demonstrating that this population contained influenza-  
304 specific T cells (**Fig. 4G**). Furthermore, the frequency of EM CD8<sup>+</sup> T cells with a Tc17 phenotype  
305 was significantly increased only in high responders after vaccination (**Fig. 4H**). Additionally, the  
306 frequency of EM CD4<sup>+</sup> T cells with Th17 phenotype was also increased in the same group of high  
307 responders after vaccination (**Fig. 4H**).

308 In summary, SIMON allowed us to identify both known and novel immune cell subsets that  
309 correlate with a robust antibody response to seasonal influenza vaccines. Particularly surprising  
310 were the number of different CD8<sup>+</sup> T cell subsets, which are not typically thought of as playing  
311 any role in promoting robust antibody responses. We confirmed that IL17A producing EM CD8<sup>+</sup>  
312 T cells, which contained a pool of pre-existing influenza T cells, were elevated in the high versus  
313 low responders with independent samples.

## 314 **Discussion**

315 In this study, we developed a novel computational approach, SIMON, for the analysis of  
316 heterogenous data collected across years and from heterogenous datasets. SIMON increases the  
317 overall accuracy of predictive models by utilizing an automated machine learning process and  
318 feature selection. Using the results obtained by SIMON, we identified previously unrecognized  
319 CD4<sup>+</sup> and CD8<sup>+</sup> T cell subsets associated with robust antibody responses to seasonal influenza  
320 vaccines.

321 The accuracy of the machine learning models presented in this work was improved in two  
322 stages. First, to interrogate the entire dataset across different clinical studies, we integrated into  
323 SIMON an algorithm, *mulset*, which generates datasets using multi-set intersections. This is  
324 particularly suitable for data with many missing values. In our case, due to the high sparsity of  
325 initial dataset, this step was essential for the further analysis. In general, clinical datasets are often  
326 faced with the same problem, namely, that many features are measured on a small number of  
327 donors. Due to the rapid advance of immune monitoring technology, many more parameters in our  
328 studies were measured in the later years than earlier. The same situation might arise when  
329 combining data collected in different facilities. An alternative approach might be the imputation  
330 of the missing values, but this would likely introduce bias. Moreover, the major limitation of  
331 effective imputation is the number of cases that could be used as prior knowledge. The sparsity of  
332 our initial dataset was too high for effective imputation. By using intersections, SIMON selects  
333 feature subsets by preserving the interpretation of the initial dataset and without introduction of a  
334 bias. Overall, an automated feature intersection process increases statistical power by accounting  
335 for variability among different individuals. Potentially, it could be applied across clinical studies.  
336 Additionally, by reducing the number of features, this process improves the performance of  
337 models. This will be particularly important for the application of SIMON on larger publicly

338 available datasets such as those stored in Gene Expression Omnibus repository (42) or ImmPort  
339 (43).

340 Second, finding the machine learning algorithm most suitable for specific data distribution  
341 allows for a better understanding of the data and provides much higher accuracy. The current state-  
342 of-the-art in building predictive models is to test several machine learning algorithms to find the  
343 optimal one. However, a single algorithm that fits all datasets doesn't exist. If an algorithm  
344 performs well on a certain dataset, it doesn't necessarily translate well to another dataset (even if  
345 it pertains to a closely related problem) (23). The overall accuracy of the predictive models depends  
346 on rigorous algorithm selection. With so many machine learning algorithms available, choosing  
347 the optimal one is a time-consuming task, often performed in a limited way (only dozens of  
348 algorithms are tested). Recent work has shown that automated machine learning can identify  
349 optimal algorithms more quickly and efficiently (44-46). Open competitions and crowdsourcing  
350 (e.g. [www.kaggle.com](http://www.kaggle.com)), in which many groups contribute machine learning algorithms to build  
351 models for the same datasets, increases the accuracy and predictive performance of the models  
352 (47). By developing an automated machine learning process in SIMON, we can quickly identify  
353 the most appropriate machine learning algorithm (of the 128 tested) for any given dataset.  
354 Additionally, SIMON offers an alternative perspective on the application of algorithms that might  
355 never be used due to lack of expertise or knowledge necessary for their implementation. These  
356 features of SIMON also allow biologists with domain knowledge but who are not computationally  
357 adept to find the most effective tools with which to analyze their data.

358 In this study, we demonstrate the utility of SIMON and its automated machine learning  
359 processes to discover the principal features that correlate with high versus low influenza vaccine  
360 responders. We found it to be essential for identifying the best-performing models and extracting



361 the most important features that contribute to those models. Performance of each model built in  
362 SIMON was automatically evaluated on both training and left-out test sets using well-known  
363 measures, such as AUROC, specificity, and sensitivity. This ensured that the model was not  
364 overfitted and that it could generalize to unseen data. Both models were selected by stringent  
365 restrictions in the exploratory analysis and were built with AUROC scores between 0.7 - 0.8.  
366 Nevertheless, since the goal of the study was to identify features that discriminate between high  
367 and low responders in a high-throughput manner, these models were built using the algorithms  
368 without any user-defined parameters. Therefore, each model could be fine-tuned, and its predictive  
369 performance might be increased. This could be of interest for researchers interested in building  
370 predictive models to identify features for use in diagnostic tests. In the future, we plan to improve  
371 SIMON by implementing an automated tuning process for each model.

372 This study demonstrated the advantage of SIMON over the conventional approach, in which  
373 one machine learning program is chosen by successfully identifying the immune signature driving  
374 influenza immunity. Some of our findings, such as the importance of effector memory CD4<sup>+</sup> T  
375 cells and subsets of memory B cells, had been identified in previous studies (2, 8, 9) serving to  
376 validate our approach. Additionally, SIMON has identified previously unappreciated T cell subsets  
377 that discriminate between high and low responders. It is well known that T cells, in contrast to  
378 antibodies produced by cells of B lineage, have the ability to provide durable and cross-protective  
379 immunity by targeting internal conserved viral epitopes (48, 49). Therefore, the CD4<sup>+</sup> and CD8<sup>+</sup>  
380 T cell subsets identified in this study could be useful targets for the development of broadly  
381 protective influenza vaccines. Influenza-specific CD4<sup>+</sup> T cells have already been shown to be  
382 important for the generation of influenza immunity (50, 51). This was confirmed in the current  
383 study by showing that high responders had a pre-existing pool of influenza-specific CD4<sup>+</sup> T cells

384 expressing CD161. Additionally, we found that CD8<sup>+</sup> T cells with an effector/TEMRA, EM and  
385 Tc17 phenotype and CXCR5 expression correlated with improved vaccine responses. These  
386 subsets are particularly interesting candidates and it will be of considerable interest to understand  
387 how they contribute to more robust antibody responses. CXCR5<sup>+</sup> CD8<sup>+</sup> T cells are enriched in the  
388 B cell follicles of germinal centers (35, 52) and they can promote B cell survival and antibody  
389 generation (36). CD8<sup>+</sup> T cells with a Tc17 phenotype have been detected in the lungs of mice  
390 challenged with influenza A virus (53). Using independent samples from donors that weren't  
391 included in the building and testing of our model, we found that CD8<sup>+</sup> T cells from high responders  
392 contained influenza-specific cells with the ability to produce IL17A in response to peptide  
393 stimulation. In a mouse model, IL17A has been shown to be important for the generation of the  
394 antibody responses necessary to clear an influenza virus infection (54). This apparent role of  
395 IL17A in the modulation of antibody responses and proper functioning of germinal centers has  
396 only recently been described (55). Interestingly, CD161<sup>+</sup> CD45RA<sup>+</sup> Tregs, the other subset we  
397 identified, have also been described as memory cells with the ability to produce IL17A (56).  
398 Therefore, both cell types may provide IL17A.

399 Here, we demonstrate that a combination of systems biology tools, advances in the field of  
400 machine learning, and experimental investigation, provides a new and more efficient way to gain  
401 biological insight from complex datasets, despite high sparsity.

## 402 **Materials and Methods**

### 403 **Subjects, sample and data collection**

404 All clinical studies were approved by the Stanford Institutional Review Board and performed  
405 in accordance with guidelines on human cell research. Peripheral blood samples were obtained at  
406 the Clinical and Translational Research Unit at Stanford University after written informed

407 consent/assent was obtained from participants. Samples were processed and cryopreserved by the  
408 Stanford HIMC BioBank according to the standard operating protocols (57). All materials and data  
409 were analyzed anonymously.

410 In this study, we used data from one hundred and eighty-seven healthy donors that were  
411 enrolled in influenza vaccine studies at the Stanford-LPCH Vaccine Program from the 2007 to  
412 2014. This included the following studies: SLVP015 (NCT01827462, NIAID ImmPort accession  
413 number SDY212, data analysis described in (58)), SLVP017 (NCT02133781, NCT03020498,  
414 NCT03020537), SLVP018 (NCT01987349, NCT03022396, NCT03022422, NCT03022435,  
415 NCT3023176, data analysis published in (59)), SLVP021 (NCT02141581), SLVP028  
416 (NCT03088904) and SLVP029 (NCT03028974). Individuals were selected for this study based on  
417 the following criteria: (1) age range from 8-40 years, (2) received inactivated influenza vaccine  
418 (IIV, Fluzone, intramuscularly), (3) only data from the first visit (some donors came in consecutive  
419 years), (4) HAI titer measured and (5) information about gender and age available.  
420 Exclusion/inclusion criteria, samples that were acquired with timepoints and analyses performed  
421 are described in the study record details at website repository for clinical studies  
422 ([www.ClinicalTrials.gov](http://www.ClinicalTrials.gov)) using provided identifiers. All the protocols for sample analysis such as  
423 immunophenotyping and determination of signaling responses to stimulation using flow or mass  
424 cytometry, HAI titer determination and determination of cytokines/chemokines in samples using  
425 Luminex assay are available online (57). Additionally, immunophenotyping using mass cytometry  
426 was published in Leipold and Maecker (60). Phosphoflow assay using flow cytometry (for studies  
427 SLVP15, SLVP18 and SLVP21 from 2007 to 2011), was described in (58, 59) or for mass  
428 cytometry (for study SLVP21 in 2013) (61). Luminex assay was described in (58, 59). The HAI

429 assay was performed on sera from day 0 and day 28 using a well-established method (62) and was  
430 described before (2, 58).

431 All data used were analyzed and processed at the HIMC, as previously described (63) and  
432 uploaded to the Stanford Data Miner (64). Briefly, data from both Luminex assays were  
433 normalized at the plate level to mitigate batch and plate effects. The two median fluorescence  
434 intensity (MFI) values for each sample for each analyte were averaged, and then log-base 2  
435 transformed. Z-scores  $((\text{value} - \text{mean}) / \text{standard deviation})$  were computed, with means and  
436 standard deviations computed for each analyte for each plate. Thus, units of measurement were  
437  $Z_{\log 2}$  for serum Luminex. For phospho-flow data acquired on flow cytometer a fold change value  
438 was computed as the stimulated readout divided by the unstimulated readout (e.g. 90th percentile  
439 of MFI of CD4+ pSTAT5 IFN $\alpha$  stimulated / 90th percentile of CD4+ pSTAT5 unstimulated cells),  
440 while for data acquired using mass cytometry a fold change was calculated by subtracting the  
441 arcsinh (intensity) between stimulated and unstimulated (arcsinh stim – arcsinh unstim). For  
442 immunophenotyping using mass cytometer units of measurement were percentage of parent  
443 population.

#### 444 **Aggregation of data and generation of feature subsets**

445 The preprocessed data from Stanford influenza datasets were obtained from HIMC Stanford  
446 Data Miner (64). This included total of 177 csv files, which were automatically imported to the  
447 MySQL database to facilitate further analysis. Datasets were merged using shared variables, such  
448 as Donor ID, Study ID, gender, age, race, Donor visit ID, Visit year, Experimental data (connected  
449 to Donor visit ID), Assay, Name and value of the measured analyte. Data harmonization across  
450 different clinical studies was accomplished by introduction of feature termed Visit internal ID,  
451 which allowed us to discriminate between different visits of the unique donor in different years.

452 We standardized names of the vaccines, for example TIV and IIV3 were named Inactivated  
453 influenza vaccine. Finally, we calculated the vaccine outcome parameter using HAI antibody titers.  
454 High responders were determined as individuals that have HAI antibody titer for all vaccine strains  
455 above 40 and geometric mean (GeoMean) HAI fold change  $>4$ . The fold change is calculated as:  
456 GeoMean HAI antibody titer for all vaccine strains on day 28 / GeoMean HAI antibody titer for  
457 all vaccine strains on day 0. To facilitate analysis, vaccine outcome was expressed as binary value:  
458 high responders were given value of 1, while low responders value zero.

459 The aggregated dataset contained 187 donors and 3,284 features, yielding a total of 614,108  
460 datapoints. The dataset had 93.2% of missing values (572,081 missing values). To deal with  
461 missing values, in the first step of the SIMON we implemented a novel algorithm, *mulset* that  
462 allows for faster generation of datasets with all possible combinations of features and donors across  
463 initial dataset. To efficiently compute shared features and find quickly similarity between donors,  
464 *mulset* algorithm generated unique feature identifier for each donor. Then, intersection between  
465 the identifiers was used to identify shared variables. The identified, shared variables are then  
466 converted to unique shared features identifiers using hash function. Finally, data was exported  
467 from the database according to the shared features. In total, *mulset* generated 45 different datasets.  
468 To avoid proceeding with machine learning process using datasets with misleading results, we  
469 removed datasets with less than 5 features and less than 15 donors. After applying that restriction,  
470 11 datasets were deleted, and final analysis was performed on 34 datasets.

#### 471 **Overview of SIMON - Sequential Iterative Modeling “Overnight”**

472 To identify baseline immune predictors that can discriminate between high and low  
473 responders following influenza vaccination, we applied sequential, iterative modeling “overnight”,  
474 shortly SIMON. The SIMON allows for dataset generation, feature subset selection, classification,

475 evaluation of the classification performance and determination of feature importance in the  
476 selected models. The SIMON was implemented in R programming language (65) (**Data file S1**).  
477 First in SIMON we automated the process of dataset generation using *mulset* algorithm as  
478 described above. Next, each dataset was partitioned into 75% training and 25% test set with  
479 balanced class distribution of high and low responders using the function *createDataPartition*  
480 from the Caret package (31). To prevent evaluation of small test sets that would lead to misleading  
481 performance parameters, datasets with less than 10 donors in test sets were discarded. Next, the  
482 model training using 128 machine learning algorithms suitable for classification training (**Table**  
483 **S6**) was initiated for each train dataset. Test sets were hold-out for evaluation of model  
484 performance on unseen datasets. This step was crucial to prevent overfitting. All algorithms were  
485 processed in an automated way through the Caret library (31). Each model was evaluated using  
486 10-fold cross-validation (24) repeated 3-times. Additionally, performance of each model was  
487 evaluated on the test set which was held out before model training by calculating performance  
488 from a confusion matrix using available R package (66). Furthermore, contribution of each feature  
489 to the trained model was evaluated and variable importance score is calculated as described (31).  
490 All prediction metrics and performance variables are stored in the MySQL database for the final  
491 exploratory analysis. Detailed description of the overall processes is as follows.

492 *Model training and performance evaluation.* For each dataset, model training was performed  
493 on train set using 128 machine learning algorithms (**Table S6**). All algorithms were implemented  
494 without any user-defined parameters and with the default tuning parameters, as described in the  
495 Caret library (31). For each model we defined type of resampling. In this study 10-fold cross-  
496 validation repeated three times was used. Each model was then evaluated by calculating  
497 performance measures using the confusion matrix. Confusion matrix or contingency table is used

498 to evaluate the performance of a classification model on a set of data for which the true values are  
499 known. The confusion matrix has four categories (see illustration below).

|                  |                              | <b>Actual</b>                |                             |
|------------------|------------------------------|------------------------------|-----------------------------|
|                  |                              | Positive<br>(High responder) | Negative<br>(Low responder) |
| <b>Predicted</b> | Positive<br>(High responder) | True positives (TP)          | False negatives (FN)        |
|                  | Negative<br>(Low responder)  | False positives (FP)         | True negatives (TN)         |

500 True positives (TP) are cases in which classification model predicted they are high responders and  
501 indeed those cases were high responders, while true negatives (TN) correspond to cases correctly  
502 labeled as low responders. Finally, false negatives (FN) and false positives (FP) refer to low  
503 responders or high responders that were incorrectly labeled. From a confusion matrix, to evaluate  
504 classification models we calculated following performance measures. Accuracy, a measure how  
505 often the classifier is correct was calculated as  $(TP+TN)/\text{total number of observations}$ . Specificity,  
506 the proportion of actual negative cases (low responders) that were correctly identified was  
507 calculated as  $TN/(FP+TN)$ , while sensitivity (also known as recall or true positive rate), the  
508 proportion of actual positive cases (high responders) correctly labeled was calculated as  
509  $TP/(TP+FN)$ . To summarize the performance of classification models over all possible thresholds,  
510 we generated the Receiver Operating Characteristic (ROC) curve by plotting the sensitivity (y-  
511 axis) and the false positive rate (the proportion of low responders misclassified as high responders),  
512 which was calculated as 1-specificity (x-axis). Finally, we calculated the area under the ROC curve  
513 (AUROC) using an R package (66) and used this measure to summarize the performance of the  
514 models. AUROC has values between zero and one, and higher values indicate better performance.  
515 Value of 0.5 indicates a random classifier, and this was used as a cutoff to remove classifiers that  
516 could not distinguish between high and low responders better than by random chance. In this study,

517 10-fold cross validation was applied three times, the AUROC was calculated for each repeated  
518 iteration, and the average AUROC (and other measures) are reported as an overall quantitative  
519 estimate of classification performance. Additionally, before model training, same seed for random  
520 number generator was applied (*set.seed* 1234). This resulted in the uniformity where for each  
521 model same resamples were used for performance evaluation. From this, we compared models and  
522 evaluated which model was performing better in terms of AUROC values by comparing  
523 performance of the resampling distributions using functions described in the Caret (31).

524 *Independent evaluation of the trained model.* The performance of each model was  
525 additionally evaluated on the test set which was held out before training the model (25% of the  
526 dataset). The performance on the test set was evaluated exactly as described for the train set above.  
527 Confusion matrix was built and all the performance measures, including the AUROC, as for train  
528 set were computed. Test AUROC was used to select models, in addition to train AUROC.

529 *Variable importance score.* Contribution of each feature to the model i.e. variable  
530 importance score was calculated using the Caret library (31). Briefly, evaluation of the variable  
531 importance was calculated directly from the model specific metrics and the variable importance  
532 scores were scaled to have a maximum value of 100. Since in SIMON we utilized many different  
533 algorithms, the contribution of each feature to the model was estimated using the methods  
534 appropriate for each algorithm, as described in R packages (see reference list for the **Table S6**).

### 535 **Feature selection using Boruta algorithm**

536 To evaluate the all-relevant features for the selected top-performing models built on datasets  
537 13 and 36, we used an R package Boruta (22). Boruta algorithm performs as a wrapper algorithm  
538 around Random Forest (22). The method is suitable for selection of all-relevant features, and this  
539 is accomplished by comparing original features' importance with importance achievable at random



540 (estimated using permuted copies of the original features, called shadow features). In each  
541 iteration, Boruta removes irrelevant features and evaluates the performance of the model. Finally,  
542 analysis is finished either when all features are confirmed or rejected or when Boruta reaches a  
543 specified limit of runs. Boruta was performed using following parameters: maximal number of  
544 importance source runs, *maxRuns* at 1000, *pValue* confidence level 0.05, a multiple comparisons  
545 adjustment using Bonferroni method was applied (*mcAdj* set to TRUE), feature importance was  
546 obtained using Random Ferns (function *getImpFerns*) and to ensure reproducibility of the results  
547 we set the seed for the random number generator (*set.seed* 1337). Tentative features were also  
548 included returned in the Boruta results (*withTentative* argument was set to TRUE).

#### 549 **Peptide stimulation and intracellular cytokine staining using mass cytometry**

550 Thawed PBMC were rested in X-VIVO™ 15 medium (Lonza) supplemented with 10% FCS  
551 and human serum AB (Sigma) for 2 days at  $10^7$  cells/ml in 24-well plate following “RESTORE”  
552 protocol (67, 68). For stimulation assay,  $5 \times 10^6$  PBMC were seeded in 96-well V-bottom plates  
553 ( $10^6$  PBMC/well) and stimulated overnight (12-16h) with the influenza overlapping peptide pool.  
554 Influenza peptide pool contained 483 peptides (20mers with 11aa overlap, Sigma Aldrich)  
555 spanning the entire influenza proteome from the influenza strain A/California/07/2009 (dissolved  
556 in DMSO at 20mg/ml, working concentration 0.2ug/ml/peptide) and 24 peptides with HLA-  
557 A\*0201-specificity (9-10mers, Sigma Aldrich) generated against influenza proteins  
558 (hemagglutinin, nucleocapsid protein, matrix protein 1, nonstructural protein 1 and 2) from the  
559 influenza strain A/California/07/2009 using prediction software NetCTL-1.2 (69) (dissolved in  
560 water or PBS/DMSO at 20mg/ml, working concentration 2ug/ml/peptide) (**Table S18**). In both  
561 assay unstimulated sample was prepared in which only medium without peptides containing 0.5%  
562 DMSO was added. Protein transport inhibitor cocktail (eBioscience/Thermo Fisher) and antibody

563 against CD107a were added at the beginning of the assay. After peptide stimulations, PBMC were  
564 washed with the CyFACS buffer (PBS supplemented with 2% BSA, 2 mM EDTA, and 0.1% sodium  
565 azide) and stained with surface antibody cocktail (**Table S17**), filtered through 0.1µm spin filter  
566 with 20µL/sample of Fc block (ThermoFisher) for 30min at 4°C. Cells were then washed with  
567 CyFACS buffer and incubated for 5min at RT in 1xPBS (Lonza) with 1/1000 diluted cisplatin  
568 (Fluidigm). Cells were then incubated for 1h at RT (or left at 4°C overnight) in the Iridium-  
569 intercalator solution in fixation and permeabilization buffer (BD Cytotfix/Cytoperm™, BD  
570 Biosciences). Then cells were washed with 1x permeabilization buffer (BD Perm/Wash™, BD  
571 Biosciences) and stained for 30min at RT with intracellular antibody cocktail diluted in 1x  
572 permeabilization buffer (**Table S17**). Cells were fixed with BD Cytotfix/Cytoperm™ and left  
573 overnight until analysis, or immediately used for mass cytometry. Immediately before starting the  
574 analysis, cells were washed in CyFACS buffer, then PBS and finally with MiliQ water. Prior to  
575 data acquisition, cells were resuspended in MilliQ water containing 1/10 diluted normalization  
576 beads (EQ Four Element Calibration Beads, Fluidigm) to the concentration of less than  $8 \times 10^5$   
577 cells/ml to achieve an acquisition rate of 400 events/s on the CyTOF Helios mass cytometer  
578 (Fluidigm). In each sample 1-1.5 million cells were acquired. After acquisition, data were  
579 normalized with the reference EQ passport P13H2302 (70) and further data analysis was  
580 performed using FlowJo v10.

## 581 **Statistical Analysis**

582 All the statistical parameters (sample size, statistical tests, and statistical significance) are  
583 reported in the Figures and Figure Legends. Significance of differences in frequencies of the  
584 immune cell subsets between high and low responders in the datasets was calculated using the  
585 Significance analysis of microarrays (SAM) (71) at false discover rate (FDR) < 1%. Mass

586 cytometry data between two groups after peptide stimulation were analyzed using the one-way  
587 ANOVA Kruskal-Wallis test followed by Dunn's multiple comparison test, while paired samples  
588 within groups were compared with two-tailed Wilcoxon matched-pairs signed rank test.  
589 Additionally, pairwise t-test with the Benjamini-Hochberg (B-H) correction for multiple testing  
590 adjustment with 0.95 confidence level was used to evaluate changes in the cell frequencies after  
591 vaccination within groups. Pearson's correlation coefficient was used to evaluate the correlations  
592 between features from the top-performing models. The Corrplot package in R was used to calculate  
593 correlation coefficients, statistics and for visualization of the correlation matrix (72). P-values were  
594 adjusted for multiple comparisons by using the Benjamini-Hochberg correction (73). Statistical  
595 analyses were performed with GraphPad PRISM 7.04 (Graph Pad Software) or in R, and p values  
596 above 0.05 were considered not significant.

#### 597 **Code and data availability**

598 The source code of the *mulset* algorithm is available from <https://github.com/LogIN-/mulset>.  
599 The *mulset* is available as an R package in CRAN, a repository of open-source software. Pseudo-  
600 code for SIMON is available as **Data file S1**. All data used in SIMON analysis are available from  
601 the Stanford Data Miner ([www.datamt.net](http://www.datamt.net)). Mass cytometry fcs files related to Figure 4  
602 (<https://zenodo.org/record/1328286>) are available on a research data repository Zenodo  
603 maintained by OpenAIRE and CERN ([www.zenodo.org](http://www.zenodo.org)).

#### 604 **Supplementary Materials**

605 Fig. S1. Distribution of high and low responders included in the initial dataset based on gender,  
606 CMV status and study year

607 Fig. S2. Assays performed across different clinical studies and study years.

- 608 Fig. S3. Staining profiles and gating scheme of immune cell subsets analyzed using mass  
609 cytometry.
- 610 Fig. S4. Visualization of the initial dataset in the context of missing values.
- 611 Fig. S5. Performance evaluation of models build on datasets 13 and 36 after applying restriction  
612 filters.
- 613 Fig. S6. Heatmap of the correlation coefficients calculated between features from the dataset 13.
- 614 Fig. S7. Importance of features determined by Boruta.
- 615 Fig. S8. Heatmap of the correlation coefficients calculated between features from the dataset 36.
- 616 Table S1. List of 102 analyzed immune cell subsets showing gating strategy.
- 617 Table S2. Immune cell subsets and phosphorylation of proteins identified using phosphorylated  
618 cytometry.
- 619 Table S3. Cytokines, chemokines and growth factors analyzed by Luminex.
- 620 Table S4. Sparsity calculated by column.
- 621 Table S5. 34 datasets generated using intersections.
- 622 Table S6. List of machine learning algorithms implemented in SIMON.
- 623 Table S7. List of all models built and their minimal and maximal AUROC values.
- 624 Table S8. List of all models with minimal and maximal AUROC values after applying  
625 performance restriction filters.
- 626 Table S9. List of models with maximal train and test AUROC.
- 627 Table S10. All models built on dataset 36 after restriction filters applied.

628 Table S11. All models built on dataset 13 after restriction filters applied.

629 Table S12. Characteristics of individuals with high and low response to influenza vaccination  
630 selected in the dataset 13.

631 Table S13. List of features and their variable importance score in dataset 13.

632 Table S14. Characteristics of individuals with high and low response to influenza vaccination  
633 used for experimental validations.

634 Table S15. Characteristics of individuals with high and low response to influenza vaccination  
635 selected in the dataset 36.

636 Table S16. List of features and their variable importance score in dataset 36.

637 Table S17. Antibody panel for ICS mass cytometry.

638 Table S18. List of peptides in the influenza peptide pool.

639 Data file S1. Pseudocode for SIMON.

640 **References and Notes:**

- 641 1. Mooney, M., S. McWeeney, G. Canderan, and R. P. Sekaly. 2013. A systems framework  
642 for vaccine design. *Curr Opin Immunol* 25: 551-555.
- 643 2. Furman, D., V. Jojic, B. Kidd, S. Shen-Orr, J. Price, J. Jarrell, T. Tse, H. Huang, P. Lund,  
644 H. T. Maecker, P. J. Utz, C. L. Dekker, D. Koller, and M. M. Davis. 2013. Apoptosis and  
645 other immune biomarkers predict influenza vaccine responsiveness. *Mol Syst Biol* 9: 659.
- 646 3. Nakaya, H. I., J. Wrammert, E. K. Lee, L. Racioppi, S. Marie-Kunze, W. N. Haining, A.  
647 R. Means, S. P. Kasturi, N. Khan, G. M. Li, M. McCausland, V. Kanchan, K. E. Kokko, S.  
648 Li, R. Elbein, A. K. Mehta, A. Aderem, K. Subbarao, R. Ahmed, and B. Pulendran. 2011.

- 649 Systems biology of vaccination for seasonal influenza in humans. *Nat Immunol* 12: 786-  
650 795.
- 651 4. Pulendran, B. 2014. Systems vaccinology: probing humanity's diverse immune systems  
652 with vaccines. *Proc Natl Acad Sci U S A* 111: 12300-12306.
- 653 5. Bernstein, A., B. Pulendran, and R. Rappuoli. 2011. Systems vaccinomics: the road ahead  
654 for vaccinology. *OMICS* 15: 529-531.
- 655 6. Poland, G. A., I. G. Ovsyannikova, R. M. Jacobson, and D. I. Smith. 2007. Heterogeneity  
656 in vaccine immune response: the role of immunogenetics and the emerging field of  
657 vaccinomics. *Clin Pharmacol Ther* 82: 653-664.
- 658 7. Furman, D., B. P. Hejblum, N. Simon, V. Jojic, C. L. Dekker, R. Thiebaut, R. J. Tibshirani,  
659 and M. M. Davis. 2014. Systems analysis of sex differences reveals an immunosuppressive  
660 role for testosterone in the response to influenza vaccination. *Proc Natl Acad Sci U S A*  
661 111: 869-874.
- 662 8. Tsang, J. S., P. L. Schwartzberg, Y. Kotliarov, A. Biancotto, Z. Xie, R. N. Germain, E.  
663 Wang, M. J. Olnes, M. Narayanan, H. Golding, S. Moir, H. B. Dickler, S. Perl, F. Cheung,  
664 H. C. Baylor, and C. H. I. Consortium. 2014. Global analyses of human immune variation  
665 reveal baseline predictors of postvaccination responses. *Cell* 157: 499-513.
- 666 9. Nakaya, H. I., T. Hagan, S. S. Duraisingham, E. K. Lee, M. Kwissa, N. Roupheal, D.  
667 Frasca, M. Gersten, A. K. Mehta, R. Gaujoux, G. M. Li, S. Gupta, R. Ahmed, M. J.  
668 Mulligan, S. Shen-Orr, B. B. Blomberg, S. Subramaniam, and B. Pulendran. 2015. Systems  
669 Analysis of Immunity to Influenza Vaccination across Multiple Years and in Diverse  
670 Populations Reveals Shared Molecular Signatures. *Immunity* 43: 1186-1198.

- 671 10. Hipc-Chi Signatures Project Team, and Hipc- I. Consortium. 2017. Multicohort analysis  
672 reveals baseline transcriptional predictors of influenza vaccination responses. *Sci Immunol*  
673 2.
- 674 11. Hagan, T., H. I. Nakaya, S. Subramaniam, and B. Pulendran. 2015. Systems vaccinology:  
675 Enabling rational vaccine design with systems biological approaches. *Vaccine* 33: 5294-  
676 5301.
- 677 12. Gomez-Cabrero, D., I. Abugessaisa, D. Maier, A. Teschendorff, M. Merckenschlager, A.  
678 Gisel, E. Ballestar, E. Bongcam-Rudloff, A. Conesa, and J. Tegner. 2014. Data integration  
679 in the era of omics: current and future challenges. *BMC Syst Biol* 8 Suppl 2: I1.
- 680 13. Zalocusky, K. A., M. J. Kan, Z. Hu, P. Dunn, E. Thomson, J. Wisner, S. Bhattacharya, and  
681 A. J. Butte. 2017. The 10,000 Immunomes Project: A resource for human immunology.  
682 *bioRxiv*.
- 683 14. Centers for Disease Control Prevention. 2013. Prevention and control of seasonal influenza  
684 with vaccines. Recommendations of the Advisory Committee on Immunization Practices-  
685 -United States, 2013-2014. *MMWR Recomm Rep* 62: 1-43.
- 686 15. Grohskopf, L. A., L. Z. Sokolow, K. R. Broder, E. B. Walter, J. S. Bresee, A. M. Fry, and  
687 D. B. Jernigan. 2017. Prevention and Control of Seasonal Influenza With Vaccines:  
688 Recommendations of the Advisory Committee on Immunization Practices-United States,  
689 2017-18 Influenza Season. *Am J Transplant* 17: 2970-2982.
- 690 16. Jackson, M. L., J. R. Chung, L. A. Jackson, C. H. Phillips, J. Benoit, A. S. Monto, E. T.  
691 Martin, E. A. Belongia, H. Q. McLean, M. Gaglani, K. Murthy, R. Zimmerman, M. P.  
692 Nowalk, A. M. Fry, and B. Flannery. 2017. Influenza Vaccine Effectiveness in the United  
693 States during the 2015-2016 Season. *N Engl J Med* 377: 534-543.

- 694 17. Aittokallio, T. 2010. Dealing with missing values in large-scale studies: microarray data  
695 imputation and beyond. *Brief Bioinform* 11: 253-264.
- 696 18. Aha, D. W., and R. L. Bankert. 1996. A Comparative Evaluation of Sequential Feature  
697 Selection Algorithms. In *Learning from Data. Lecture Notes in Statistics*. Fisher D, and L.  
698 HJ, eds. Springer, New York.
- 699 19. Wang, M., Y. Zhao, and B. Zhang. 2015. Efficient Test and Visualization of Multi-Set  
700 Intersections. *Sci Rep* 5: 16923.
- 701 20. Wang, J., W. Liu, S. Kumar, and S. Chang. 2015. Learning to Hash for Indexing Big Data  
702 - A Survey. *Proceedings of the IEEE* 104: 34 - 57.
- 703 21. Kohavi, R., and G. H. John. 1997. Wrappers for feature subset selection. *Artif Intell* 97:  
704 273-324.
- 705 22. Kursu, M. B., and W. R. Rudnicki. 2010. Feature Selection with the Boruta Package. *J Stat*  
706 *Softw* 36: 1-13.
- 707 23. Wolpert, D. H., and W. G. Macready. 1997. No Free Lunch Theorems for Optimization.  
708 *IEEE TRANSACTIONS ON EVOLUTIONARY COMPUTATION* 1: 67-82.
- 709 24. Kohavi, R. 1995. A study of cross-validation and bootstrap for accuracy estimation and  
710 model selection. *Appears in the International Joint Conference on Artificial Intelligence*  
711 *(IJCAI)*.
- 712 25. Stehman, S. V. 1997. Selecting and interpreting measures of thematic classification  
713 accuracy. *Remote Sens Environ* 62: 77-89.
- 714 26. Sonogo, P., A. Kocsor, and S. Pongor. 2008. ROC analysis: applications to the  
715 classification of biological sequences and 3D structures. *Briefings in Bioinformatics* 9:  
716 198-209.



- 717 27. Fawcett, T. 2006. An introduction to ROC analysis. *Pattern Recogn Lett* 27: 861-874.
- 718 28. Hand, D. J., and C. Anagnostopoulos. 2013. When is the area under the receiver operating  
719 characteristic curve an appropriate measure of classifier performance? *Pattern Recogn Lett*  
720 34: 492-495.
- 721 29. Hand, D. J. 2009. Measuring classifier performance: a coherent alternative to the area under  
722 the ROC curve. *Mach Learn* 77: 103-123.
- 723 30. Ludemann, L., W. Grieger, R. Wurm, P. Wust, and C. Zimmer. 2006. Glioma assessment  
724 using quantitative blood volume maps generated by T1-weighted dynamic contrast-  
725 enhanced magnetic resonance imaging: A receiver operating characteristic study. *Acta*  
726 *Radiol* 47: 303-310.
- 727 31. Kuhn, M., and S. W. Contributions from Jed Wing, Andre Williams, Chris Keefer, Allan  
728 Engelhardt, Tony Cooper, Zachary Mayer, Brenton Kenkel, the R Core Team, Michael  
729 Benesty, Reynald Lescarbeau, Andrew Ziem, Luca Scrucca, Yuan Tang, Can Candan, and  
730 Tyler Hunt. 2018. caret: Classification and Regression Training. 6.0-80 ed. R package.  
731 caret: Classification and Regression Training.
- 732 32. Liu, W., A. L. Putnam, Z. Xu-Yu, G. L. Szot, M. R. Lee, S. Zhu, P. A. Gottlieb, P.  
733 Kapranov, T. R. Gingeras, B. Fazekas de St Groth, C. Clayberger, D. M. Soper, S. F.  
734 Ziegler, and J. A. Bluestone. 2006. CD127 expression inversely correlates with FoxP3 and  
735 suppressive function of human CD4+ T reg cells. *J Exp Med* 203: 1701-1711.
- 736 33. Fergusson, J. R., K. E. Smith, V. M. Fleming, N. Rajoriya, E. W. Newell, R. Simmons, E.  
737 Marchi, S. Bjorkander, Y. H. Kang, L. Swadling, A. Kurioka, N. Sahgal, H. Lockstone, D.  
738 Baban, G. J. Freeman, E. Sverremark-Ekstrom, M. M. Davis, M. P. Davenport, V. Venturi,

- 739 J. E. Ussher, C. B. Willberg, and P. Klenerman. 2014. CD161 defines a transcriptional and  
740 functional phenotype across distinct human T cell lineages. *Cell Rep* 9: 1075-1088.
- 741 34. He, R., S. Hou, C. Liu, A. Zhang, Q. Bai, M. Han, Y. Yang, G. Wei, T. Shen, X. Yang, L.  
742 Xu, X. Chen, Y. Hao, P. Wang, C. Zhu, J. Ou, H. Liang, T. Ni, X. Zhang, X. Zhou, K.  
743 Deng, Y. Chen, Y. Luo, J. Xu, H. Qi, Y. Wu, and L. Ye. 2016. Follicular CXCR5-  
744 expressing CD8(+) T cells curtail chronic viral infection. *Nature* 537: 412-428.
- 745 35. Leong, Y. A., Y. Chen, H. S. Ong, D. Wu, K. Man, C. Deleage, M. Minnich, B. J. Meckiff,  
746 Y. Wei, Z. Hou, D. Zotos, K. A. Fenix, A. Atnerkar, S. Preston, J. G. Chipman, G. J.  
747 Beilman, C. C. Allison, L. Sun, P. Wang, J. Xu, J. G. Toe, H. K. Lu, Y. Tao, U. Palendira,  
748 A. L. Dent, A. L. Landay, M. Pellegrini, I. Comerford, S. R. McColl, T. W. Schacker, H.  
749 M. Long, J. D. Estes, M. Busslinger, G. T. Belz, S. R. Lewin, A. Kallies, and D. Yu. 2016.  
750 CXCR5(+) follicular cytotoxic T cells control viral infection in B cell follicles. *Nat*  
751 *Immunol* 17: 1187-1196.
- 752 36. Quigley, M. F., V. D. Gonzalez, A. Granath, J. Andersson, and J. K. Sandberg. 2007.  
753 CXCR5+ CCR7- CD8 T cells are early effector memory cells that infiltrate tonsil B cell  
754 follicles. *Eur J Immunol* 37: 3352-3362.
- 755 37. Wilkinson, T. M., C. K. Li, C. S. Chui, A. K. Huang, M. Perkins, J. C. Liebner, R.  
756 Lambkin-Williams, A. Gilbert, J. Oxford, B. Nicholas, K. J. Staples, T. Dong, D. C. Douek,  
757 A. J. McMichael, and X. N. Xu. 2012. Preexisting influenza-specific CD4+ T cells  
758 correlate with disease protection against influenza challenge in humans. *Nat Med* 18: 274-  
759 280.
- 760 38. Sobolev, O., E. Binda, S. O'Farrell, A. Lorenc, J. Pradines, Y. Huang, J. Duffner, R. Schulz,  
761 J. Cason, M. Zambon, M. H. Malim, M. Peakman, A. Cope, I. Capila, G. V. Kaundinya,

- 762 and A. C. Hayday. 2016. Adjuvanted influenza-H1N1 vaccination reveals lymphoid  
763 signatures of age-dependent early responses and of clinical adverse events. *Nat Immunol*  
764 17: 204-213.
- 765 39. Sallusto, F., D. Lenig, R. Forster, M. Lipp, and A. Lanzavecchia. 1999. Two subsets of  
766 memory T lymphocytes with distinct homing potentials and effector functions. *Nature* 401:  
767 708-712.
- 768 40. Gustafson, C. E., Q. Qi, J. Hutter-Saunders, S. Gupta, R. Jadhav, E. Newell, H. Maecker,  
769 C. M. Weyand, and J. J. Goronzy. 2017. Immune Checkpoint Function of CD85j in CD8  
770 T Cell Differentiation and Aging. *Front Immunol* 8: 692.
- 771 41. Appay, V., P. R. Dunbar, M. Callan, P. Klenerman, G. M. Gillespie, L. Papagno, G. S.  
772 Ogg, A. King, F. Lechner, C. A. Spina, S. Little, D. V. Havlir, D. D. Richman, N. Gruener,  
773 G. Pape, A. Waters, P. Easterbrook, M. Salio, V. Cerundolo, A. J. McMichael, and S. L.  
774 Rowland-Jones. 2002. Memory CD8+ T cells vary in differentiation phenotype in different  
775 persistent virus infections. *Nat Med* 8: 379-385.
- 776 42. Edgar, R., M. Domrachev, and A. E. Lash. 2002. Gene Expression Omnibus: NCBI gene  
777 expression and hybridization array data repository. *Nucleic Acids Res* 30: 207-210.
- 778 43. Bhattacharya, S., P. Dunn, C. G. Thomas, B. Smith, H. Schaefer, J. Chen, Z. Hu, K. A.  
779 Zalocusky, R. D. Shankar, S. S. Shen-Orr, E. Thomson, J. Wiser, and A. J. Butte. 2018.  
780 ImmPort, toward repurposing of open access immunological assay data for translational  
781 and clinical research. *Sci Data* 5: 180015.
- 782 44. Pedregosa, F., G. Varoquaux, A. Gramfort, V. Michel, B. Thirion, O. Grisel, M. Blondel,  
783 P. Prettenhofer, R. Weiss, V. Dubourg, J. Vanderplas, A. Passos, D. Cournapeau, M.

- 784 Brucher, M. Perrot, and E. Duchesnay. 2011. Scikit-learn: Machine Learning in Python.  
785 *Journal of Machine Learning Research* 12: 2825-2830.
- 786 45. Kotthoff, L., C. Thornton, H. H. Hoos, F. Hutter, and K. Leyton-Brown. 2016. Auto-  
787 WEKA 2.0: Automatic model selection and hyperparameter optimization in WEKA.  
788 *Journal of Machine Learning Research* 17: 1-5.
- 789 46. Olson, R. S., R. J. Urbanowicz, P. C. Andrews, N. A. Lavender, L. C. Kidd, and J. H.  
790 Moore. 2016. Automating biomedical data science through tree-based pipeline  
791 optimization. *Applications of Evolutionary Computation*: 123-137.
- 792 47. Baldassano, S. N., B. H. Brinkmann, H. Ung, T. Blevins, E. C. Conrad, K. Leyde, M. J.  
793 Cook, A. N. Khambhati, J. B. Wagenaar, G. A. Worrell, and B. Litt. 2017. Crowdsourcing  
794 seizure detection: algorithm development and validation on human implanted device  
795 recordings. *Brain* 140: 1680-1691.
- 796 48. Hayward, A. C., L. Wang, N. Goonetilleke, E. B. Fragaszy, A. Bermingham, A. Copas, O.  
797 Dukes, E. R. Millett, I. Nazareth, J. S. Nguyen-Van-Tam, J. M. Watson, M. Zambon, G.  
798 Flu Watch, A. M. Johnson, and A. J. McMichael. 2015. Natural T Cell-mediated Protection  
799 against Seasonal and Pandemic Influenza. Results of the Flu Watch Cohort Study. *Am J*  
800 *Respir Crit Care Med* 191: 1422-1431.
- 801 49. van de Sandt, C. E., M. L. Hillaire, M. M. Geelhoed-Mieras, A. D. Osterhaus, R. A.  
802 Fouchier, and G. F. Rimmelzwaan. 2015. Human Influenza A Virus-Specific CD8+ T-Cell  
803 Response Is Long-lived. *J Infect Dis* 212: 81-85.
- 804 50. Bentebibel, S. E., S. Lopez, G. Obermoser, N. Schmitt, C. Mueller, C. Harrod, E. Flano,  
805 A. Mejias, R. A. Albrecht, D. Blankenship, H. Xu, V. Pascual, J. Banchereau, A. Garcia-  
806 Sastre, A. K. Palucka, O. Ramilo, and H. Ueno. 2013. Induction of

- 807 ICOS+CXCR3+CXCR5+ TH cells correlates with antibody responses to influenza  
808 vaccination. *Sci Transl Med* 5: 176ra132.
- 809 51. Trieu, M. C., F. Zhou, S. Lartey, A. Jul-Larsen, S. Mjaaland, S. Sridhar, and R. J. Cox.  
810 2017. Long-term Maintenance of the Influenza-Specific Cross-Reactive Memory CD4+ T-  
811 Cell Responses Following Repeated Annual Influenza Vaccination. *J Infect Dis* 215: 740-  
812 749.
- 813 52. Im, S. J., M. Hashimoto, M. Y. Gerner, J. Lee, H. T. Kissick, M. C. Burger, Q. Shan, J. S.  
814 Hale, J. Lee, T. H. Nasti, A. H. Sharpe, G. J. Freeman, R. N. Germain, H. I. Nakaya, H. H.  
815 Xue, and R. Ahmed. 2016. Defining CD8+ T cells that provide the proliferative burst after  
816 PD-1 therapy. *Nature* 537: 417-421.
- 817 53. Hamada, H., L. Garcia-Hernandez Mde, J. B. Reome, S. K. Misra, T. M. Strutt, K. K.  
818 McKinstry, A. M. Cooper, S. L. Swain, and R. W. Dutton. 2009. Tc17, a unique subset of  
819 CD8 T cells that can protect against lethal influenza challenge. *J Immunol* 182: 3469-3481.
- 820 54. Wang, X., K. Ma, M. Chen, K. H. Ko, B. J. Zheng, and L. Lu. 2016. IL-17A Promotes  
821 Pulmonary B-1a Cell Differentiation via Induction of Blimp-1 Expression during Influenza  
822 Virus Infection. *PLoS Pathog* 12: e1005367.
- 823 55. Ferretti, E., M. Ponzoni, C. Doglioni, and V. Pistoia. 2016. IL-17 superfamily cytokines  
824 modulate normal germinal center B cell migration. *J Leukoc Biol* 100: 913-918.
- 825 56. Ayyoub, M., F. Deknuydt, I. Raimbaud, C. Dousset, L. Leveque, G. Bioley, and D.  
826 Valmori. 2009. Human memory FOXP3+ Tregs secrete IL-17 ex vivo and constitutively  
827 express the T(H)17 lineage-specific transcription factor RORgamma t. *Proc Natl Acad Sci*  
828 *U S A* 106: 8635-8640.

- 829 57. The Human Immune Monitoring Center. 2018. Standard protocols of the Human Immune  
830 Monitoring Center. Stanford University.
- 831 58. Furman, D., V. Jojic, S. Sharma, S. S. Shen-Orr, C. J. Angel, S. Onengut-Gumuscu, B. A.  
832 Kidd, H. T. Maecker, P. Concannon, C. L. Dekker, P. G. Thomas, and M. M. Davis. 2015.  
833 Cytomegalovirus infection enhances the immune response to influenza. *Sci Transl Med* 7:  
834 281ra243.
- 835 59. Brodin, P., V. Jojic, T. Gao, S. Bhattacharya, C. J. Angel, D. Furman, S. Shen-Orr, C. L.  
836 Dekker, G. E. Swan, A. J. Butte, H. T. Maecker, and M. M. Davis. 2015. Variation in the  
837 human immune system is largely driven by non-heritable influences. *Cell* 160: 37-47.
- 838 60. Leipold, M. D., and H. T. Maecker. 2015. Phenotyping of Live Human PBMC using  
839 CyTOF Mass Cytometry. *Bio Protoc* 5.
- 840 61. Fernandez, R., and H. Maecker. 2015. Cytokine-stimulated Phosphoflow of PBMC Using  
841 CyTOF Mass Cytometry. *Bio Protoc* 5.
- 842 62. Hirst, G. K. 1942. The Quantitative Determination of Influenza Virus and Antibodies by  
843 Means of Red Cell Agglutination. *J Exp Med* 75: 49-64.
- 844 63. Whiting, C. C., J. Siebert, A. M. Newman, H. W. Du, A. A. Alizadeh, J. Goronzy, C. M.  
845 Weyand, E. Krishnan, C. G. Fathman, and H. T. Maecker. 2015. Large-Scale and  
846 Comprehensive Immune Profiling and Functional Analysis of Normal Human Aging.  
847 *PLoS One* 10: e0133627.
- 848 64. Siebert, J. C., W. Munsil, Y. Rosenberg-Hasson, M. M. Davis, and H. T. Maecker. 2012.  
849 The Stanford Data Miner: a novel approach for integrating and exploring heterogeneous  
850 immunological data. *J Transl Med* 10: 62.

- 851 65. R Development Core Team. 2013. R: A language and environment for statistical  
852 computing. R Foundation for Statistical Computing, Vienna, Austria.
- 853 66. Robin, X., N. Turck, A. Hainard, N. Tiberti, F. Lisacek, J. C. Sanchez, and M. Muller.  
854 2011. pROC: an open-source package for R and S+ to analyze and compare ROC curves.  
855 *BMC Bioinformatics* 12: 77.
- 856 67. Wegner, J., S. Hackenberg, C. J. Scholz, S. Chuvpilo, D. Tyrstin, A. A. Matskevich, G. U.  
857 Grigoleit, S. Stevanovic, and T. Hunig. 2015. High-density preculture of PBMCs restores  
858 defective sensitivity of circulating CD8 T cells to virus- and tumor-derived antigens. *Blood*  
859 126: 185-194.
- 860 68. Romer, P. S., S. Berr, E. Avota, S. Y. Na, M. Battaglia, I. ten Berge, H. Einsele, and T.  
861 Hunig. 2011. Preculture of PBMCs at high cell density increases sensitivity of T-cell  
862 responses, revealing cytokine release by CD28 superagonist TGN1412. *Blood* 118: 6772-  
863 6782.
- 864 69. Larsen, M. V., C. Lundegaard, K. Lamberth, S. Buus, O. Lund, and M. Nielsen. 2007.  
865 Large-scale validation of methods for cytotoxic T-lymphocyte epitope prediction. *BMC*  
866 *Bioinformatics* 8: 424.
- 867 70. Finck, R., E. F. Simonds, A. Jager, S. Krishnaswamy, K. Sachs, W. Fantl, D. Pe'er, G. P.  
868 Nolan, and S. C. Bendall. 2013. Normalization of mass cytometry data with bead standards.  
869 *Cytometry A* 83: 483-494.
- 870 71. Tusher, V. G., R. Tibshirani, and G. Chu. 2001. Significance analysis of microarrays  
871 applied to the ionizing radiation response. *Proc Natl Acad Sci U S A* 98: 5116-5121.
- 872 72. Wei, T., and V. Simko. 2017. R package "corrplot": Visualization of a Correlation Matrix.  
873 Version 0.84 ed.

- 874 73. Benjamini, Y., and Y. Hochberg. 1995. Controlling the False Discovery Rate - a Practical  
875 and Powerful Approach to Multiple Testing. *J Roy Stat Soc B Met* 57: 289-300.  
876  
877



878           **Acknowledgments:** We are grateful to all individuals that participated in the research  
879 studies. Special acknowledgment to Dr. Purvesh Khatri for critical reading the manuscript. We  
880 appreciate helpful discussions and support from all members of the Davis and Y. Chien labs,  
881 specifically Elsa Sola, Allison Nau, Lisa Wagar and Asbjorn Christophersen for help with mass  
882 cytometry and input from Paula Romer. We also thank all staff members from the HIMC (Michael  
883 D. Leipold) for data analysis, management and helpful discussions and HIMC Biobank (Rohit  
884 Gupta and Janine Bodea Sung) for sample processing and storage, Stanford-LPCH Vaccine  
885 Program (Alison Holzer) for management of clinical studies and Stanford FACS facility for all the  
886 support. **Funding:** This work was supported by NIH grants (U19 AI090019, U19 AI057229) and  
887 the Howard Hughes Medical Institute to M.M.D, and by the EU's Horizon 2020 research and  
888 innovation program under the Marie Sklodowska-Curie grant (FluPRINT, Project No 796636) to  
889 A.T. **Author Contributions:** A.T. designed and performed the experiments, processed and  
890 analyzed the data and wrote the manuscript. I.T. designed the database, programmed the SIMON,  
891 analyzed the data and revised the manuscript. Y.R.H. and H.T.M. run all the experiments at the  
892 HIMC, analyzed the data and revised the manuscript. C.L.D. was responsible for regulatory  
893 approvals, protocol design, study conduct, and clinical data management. M.M.D. supervised the  
894 study and edited the manuscript. **Conflict of interests:** The authors declare that they have no  
895 conflict of interests. **Data and materials availability:** The source code of the *mulset* algorithm is  
896 available from <https://github.com/LogIN-/mulset>. The *mulset* is available as an R package in  
897 CRAN, a repository of open-source software. Pseudo-code for SIMON is available as **Data file**  
898 **S1**. All data used in SIMON analysis are available from the Stanford Data Miner  
899 ([www.datamt.net](http://www.datamt.net)). Mass cytometry fcs files related to Figure 4

900 (<https://zenodo.org/record/1328286>) are available on a research data repository Zenodo  
901 maintained by OpenAIRE and CERN ([www.zenodo.org](http://www.zenodo.org)).

902

903 **Figure legends**

904 **Fig. 1. Study design.** (A) One hundred and eighty-seven healthy donors (8-40 years of age) were  
905 recruited across eight consecutive influenza seasons. Data acquired at the baseline (day 0)  
906 included phenotypical and functional state (phosphorylated proteins) of immune cells  
907 analyzed using flow or mass cytometry and serum analysis using Luminex assay. Individuals  
908 were labelled as high or low responders, depending on the HAI antibody titers determined  
909 on day 28 after vaccination. (B) HAI antibody responses to influenza vaccine strains in high  
910 (H, red) and low (L, grey) responders across years. Numbers below x-axis indicate the  
911 number of donors in each group. HAI responses are shown as geometric mean titer (GMT)  
912 calculated as a fold change between day 0 and day 28 after vaccination for all vaccine strains.  
913 Violin plots show distribution of individuals. The line shows the median. Seroconversion is  
914 defined as 4-fold increase in HAI titer for all vaccine strains (denoted by a grey line).

915

916 **Fig. 2. Automated feature subset generation using multi-set intersect function.** Schematic  
917 example showing the initial dataset with four features and four donors. Missing values are  
918 indicated by white circles. Missing values are present in such a way that either removal of  
919 donors or features would result in no data for analysis. **(A)** Using a multi-set intersect  
920 function, the *mulset* algorithm, identified shared feature sets between donors. First, for each  
921 donor, the algorithm determined the unique feature ID. Second, using the intersect function,  
922 it identified shared features, which were then converted to shared features ID using hash  
923 functions. Finally, the *mulset* algorithm searched the database and identified donors with  
924 shared feature sets. **(B)** *Mulset* generated ten distinct datasets with defined feature and donor  
925 numbers, as indicated.  
926

927 **Fig. 3. Automated feature selection and machine learning process integrated in SIMON.**

928 Before building a model, raw data were processed (cleaned, corrected, normalized, etc.)  
929 using extract-transform-load (ETL) operations and the database was built. In the second step,  
930 new features were created from the existing data, GMT of the HAI response was calculated,  
931 and individuals were labelled as high or low responders. Third, datasets were generated using  
932 multi-set intersection function. Each dataset was then used for model training in a fully  
933 automated machine learning process, implemented in SIMON. Briefly, before training  
934 started, each dataset was partitioned into training and test sets, which were excluded from  
935 the model-building phase. Finally, in the exploratory analysis, each model was evaluated  
936 based on its performance, and features were selected based on the importance score.

937

938 **Fig. 4. SIMON identifies cellular signature associated with the successful generation of**  
939 **influenza immunity after vaccination. (A)** Features with variable importance score above  
940 50 from the model built on dataset 13 are shown. **(B)** Raw data confirmed by SAM analysis  
941 to be significantly changed in the donors from dataset 13, indicating frequency of cells (as a  
942 percentage of the parent population). **(C)** Representative plot showing TNF $\alpha$  intracellular  
943 staining of CD161<sup>+</sup> CD4<sup>+</sup> T cells in the unstimulated (-) or influenza peptide pool (+)  
944 stimulated PBMC from high responder obtained before vaccination. Graph on the right  
945 shows the frequency of TNF $\alpha$ <sup>+</sup> CD161<sup>+</sup> CD4<sup>+</sup> T cells from high responders (red circles) and  
946 low responders (grey circles) in the samples before vaccination. Individual donors are  
947 connected with lines. **(D)** Violin plots show distribution of frequency of CD161<sup>+</sup> CD4<sup>+</sup> T  
948 cells and CXCR5<sup>+</sup> CD8<sup>+</sup> T with Tc2 and Tc17 phenotype in the PBMC samples derived  
949 from high (red, n = 7) and low responders (grey, n = 7) analyzed before vaccination (-) and  
950 on day 28 after vaccination (+). **(E)** Variable importance score of features selected in the  
951 model built on dataset 36 with score above 50. **(F)** Significant immune cell subsets selected  
952 by SAM analysis shown as raw data corresponding to donors from dataset 36, indicating  
953 frequency of cells (as percentage of parent population). **(G)** Representative plot showing  
954 IL17A intracellular staining of EM CD8<sup>+</sup> T cells in the unstimulated (-) or influenza peptide  
955 pool stimulated (+) PBMC from high responders, obtained after vaccination. The graph on  
956 the right shows the frequency of IL17A<sup>+</sup> EM CD8<sup>+</sup> T cells from high (red circles) and low  
957 (grey circles) responders in the samples after vaccination. **(H)** Violin plots show distribution  
958 of frequency of CD4<sup>+</sup> and CD8<sup>+</sup> T cells, with indicated phenotypes analyzed in the PBMC  
959 samples derived from high (red, n = 7) and low responders (grey, n = 7) before (-) and on  
960 day 28 after (+) vaccination. Graphs shown in **(C, D, G and H)** represent combined data

961 from seven independent experiments. Violin plots show distribution of individuals. These  
962 are represented by red circles for high responders and grey circles for low responders. The  
963 line indicates the median. Statistical analysis between high and low responders was  
964 performed with one-way ANOVA Kruskal-Wallis test followed by Dunn's multiple  
965 comparison test. Analysis within groups before and after vaccination was calculated using  
966 two-tailed Wilcoxon matched-pairs signed rank test. Significance in SAM analysis was  
967 considered at  $FDR < 0.01$ . ns - not significant, \* $p < 0.05$ , \*\* $p < 0.01$ .

**A**

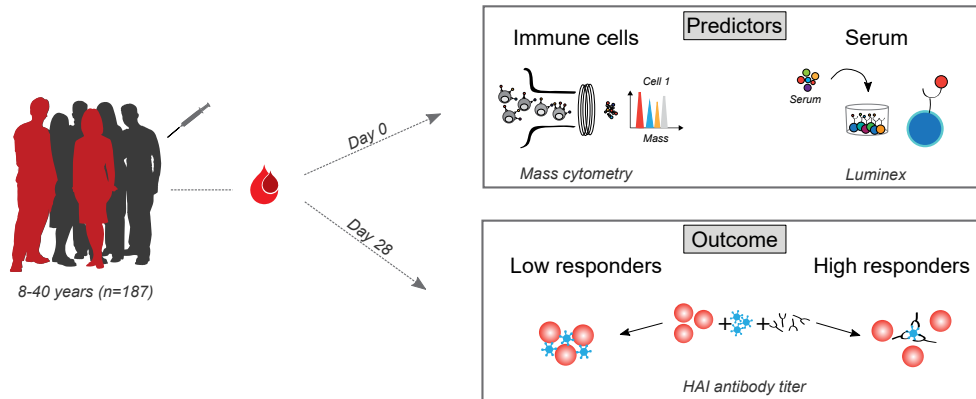

**B**

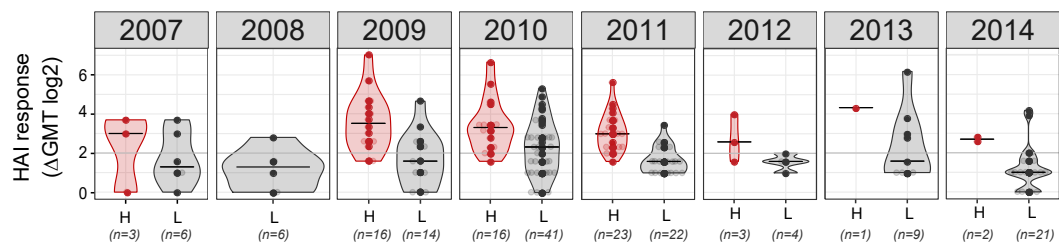



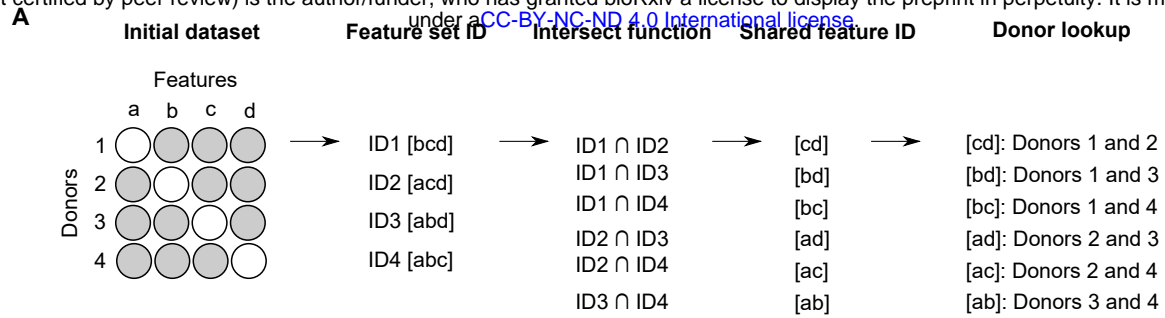

**B**

**Generated datasets using multi-set intersect function**

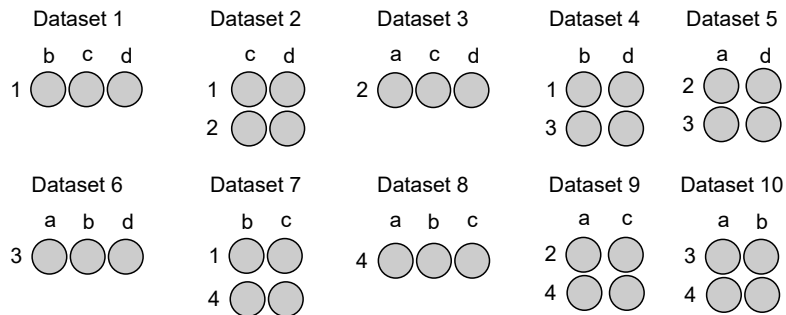

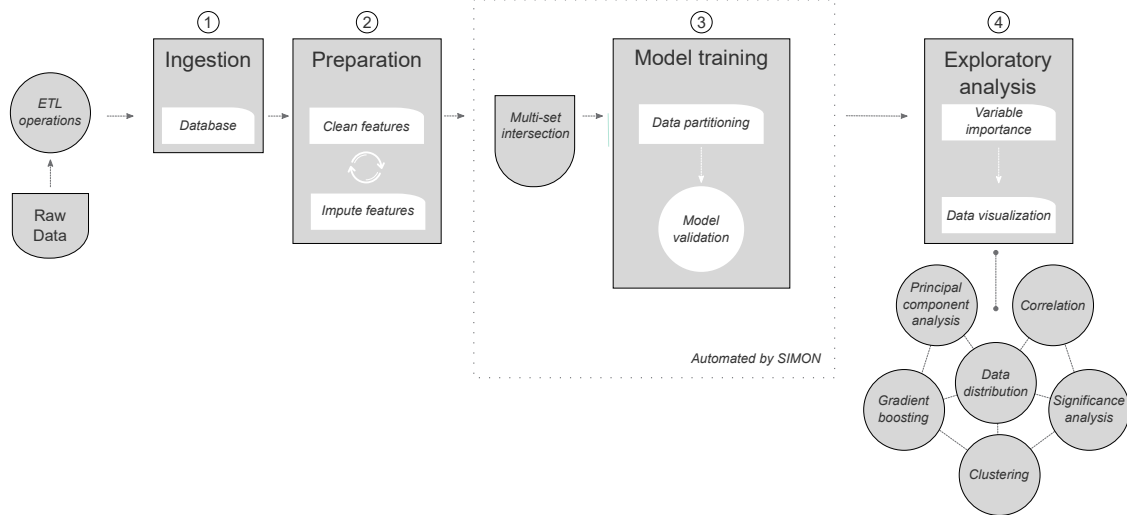

Tomic et al.  
Figure 3.

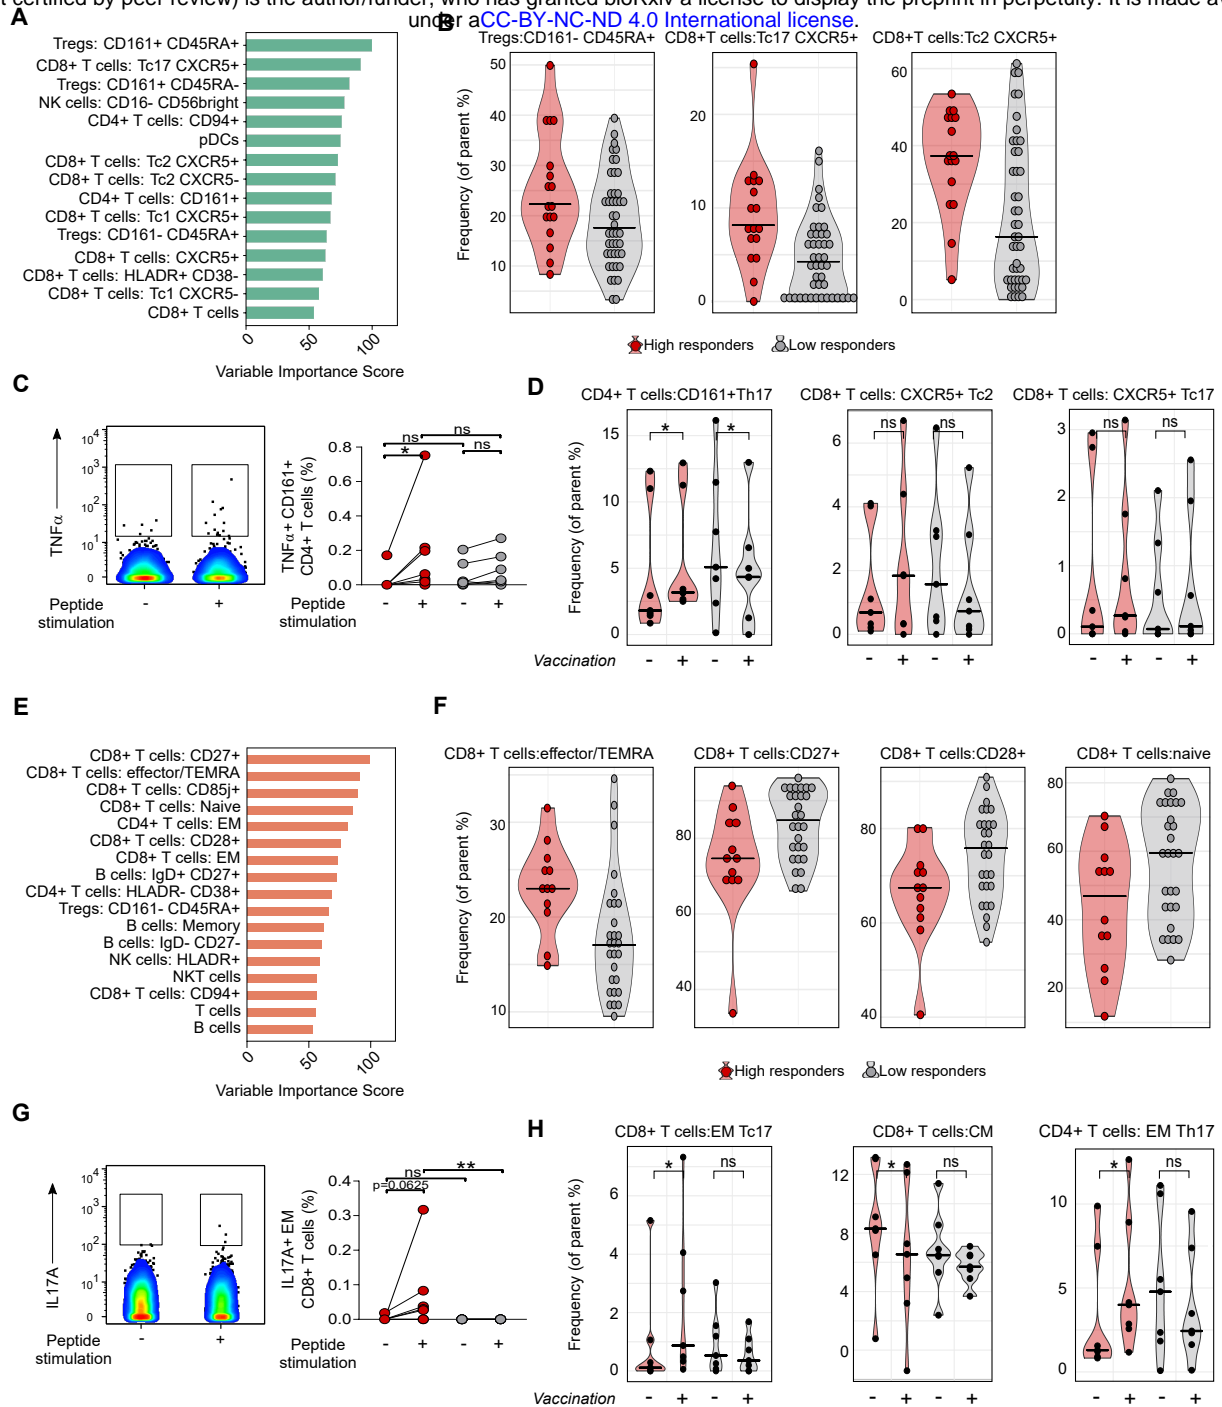

Tomic et al.  
Figure 4.
